# Supplementary material
Source: PubMed Central journal article supplement (PMC6050756)
Supplement: mmc1.pdf [file mmc1.pdf]

**Biophysical Journal, Volume 115**

**Supplemental Information**

**Variational Algorithms for Analyzing Noisy Multistate Diffusion  
Trajectories**

**Martin Lindén and Johan Elf**

# Variational algorithms for analyzing noisy multi-state diffusion trajectories – supplementary material

Martin Lindén\* and Johan Elf†

*Department of Cell and Molecular Biology, Uppsala University, Sweden.*

(Dated: May 25, 2018)

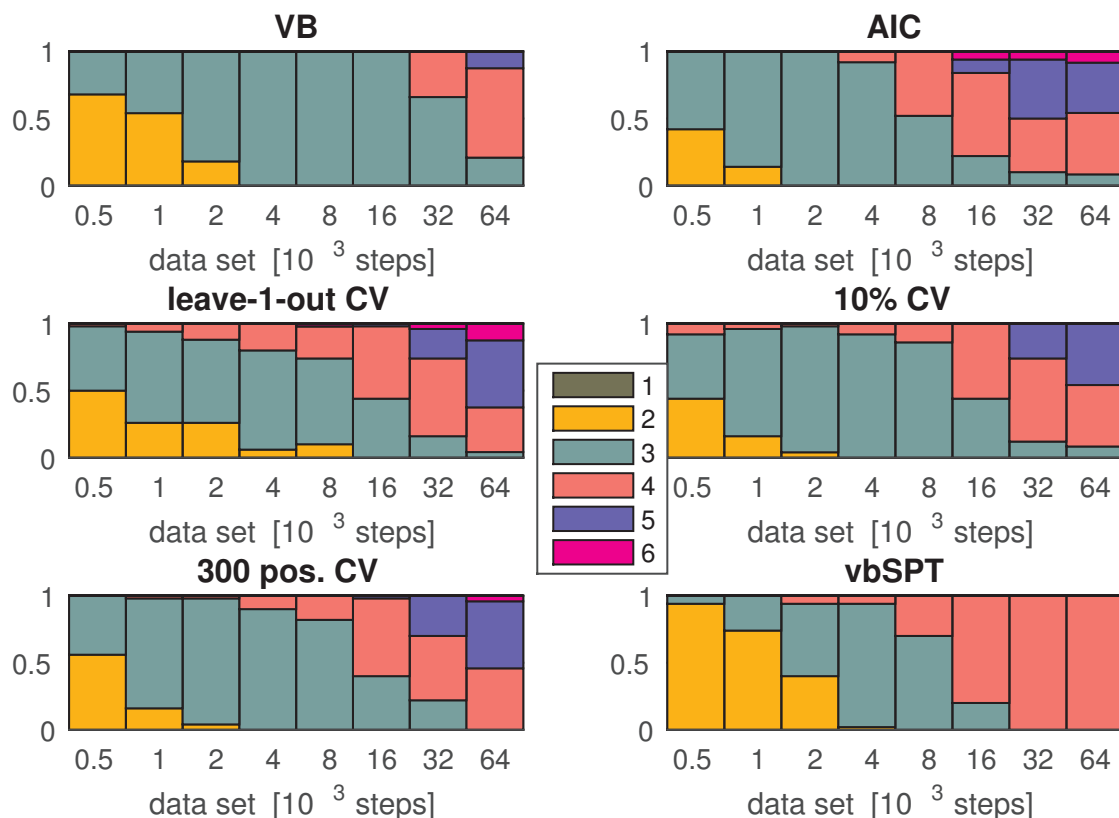

Figure S1: Performance of different model selection criteria on the simulated 3-state data sets used in Fig. 1. The graphs show the fraction of data sets classified to different number of states, where 3 states is the true answer. Model selection criteria: Criteria: Variational Bayes (“VB”), Akaike’s information criterion (“AIC”), pseudo-Bayes factor (PBF) cross-validation on single trajectories (“leave-1-out CV”), PBF cross-validation on randomly selected trajectories corresponding to 10% of the total data set (“10% CV”), PBF cross-validation on randomly selected trajectories with about 300 positions in total (“300 pos. CV”), variational Bayes with vbSPT [1], which uses a model without localization errors or motion blur (“vbSPT”).

\* martin.linden@icm.uu.se

† johan.elf@icm.uu.se

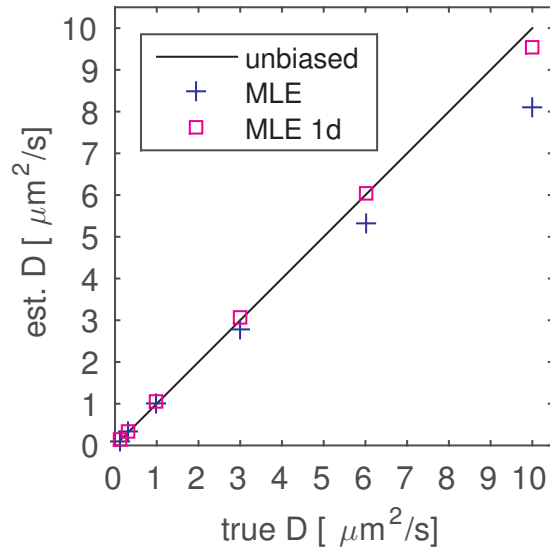

Figure S2: Diffusion constant estimates in an *E coli* geometry. Maximum likelihood estimates of diffusion constant, from simulated movies with a single diffusive state and otherwise as for Fig. 5. We estimated based on both  $x, y$ -coordinates (+) and position along the long cell axis (“MLE 1d”, square). The downward bias in the  $x, y$ -analysis for high diffusion constants is comparable to the one seen for slow kinetics in Fig. 5b, which also used  $x, y$ -coordinates, but using the long axis (1d) coordinate only reduces the bias. This rules out state-switching or bias from prior parameters (which are absent here). However, the fact that the 1d analysis is less biased argues strongly for a confinement artifact, since motion perpendicular to the cell long axis is more severely confined. Bootstrap standard error (not shown) are smaller than the symbols.

In the next sections, we go through the trajectory model and derivation of the variational inference algorithms in detail. We first consider the case where both positions and localization uncertainties are estimated from the data. Variations of the algorithms where localization uncertainties are instead model parameters are considered in Sec. S5. This text is an excerpt from the vbSPTu software documentation, available at <https://github.com/bmelinden/>.

## CONTENTS

|                                                                |    |
|----------------------------------------------------------------|----|
| S1. Model with estimated uncertainties                         | 4  |
| S1.1. Data                                                     | 4  |
| S1.2. Equations of motion                                      | 4  |
| S1.3. Likelihood                                               | 5  |
| S2. Inference, model selection, and variational approximations | 6  |
| S2.1. Maximum evidence and Variational Bayes inference         | 6  |
| S2.2. Maximum a posteriori estimates (MAP)                     | 6  |
| S2.3. Maximum likelihood estimates (MLE)                       | 7  |
| S2.4. Cross-validation with point-estimates                    | 7  |
| S2.5. Pseudo-Bayes factors                                     | 8  |
| S3. Variational Bayes algorithm                                | 8  |
| S3.1. Initial state and transition probabilities               | 8  |
| S3.2. Dwell times                                              | 10 |
| S3.3. Step variance                                            | 11 |
| S3.4. Hidden states                                            | 12 |
| S3.5. Hidden trajectories                                      | 12 |
| S3.6. The lower bound                                          | 15 |
| S4. Maximum likelihood and maximum a posteriori inference      | 16 |
| S4.1. Parameter updates and log likelihood                     | 16 |
| S4.2. Transition matrix parameterization                       | 17 |
| S5. Learning the localization uncertainty                      | 18 |
| S5.1. Average localization uncertainty                         | 18 |
| S5.2. State-wise localization uncertainty                      | 19 |
| References                                                     | 20 |

## S1. MODEL WITH ESTIMATED UNCERTAINTIES

Here, we simply state a diffusive hidden Markov model which assumes free diffusion in  $\dim$  dimensions and generalizes the Berglund model of camera-based tracking [2] to free diffusion in  $\dim$  dimensions, with diffusion constant governed by a discrete state Markov process, and arbitrary uncorrelated localization errors. This model was previously considered in Ref. [3], and we refer to the supporting information of that work for details of the derivation. Here, we closely follow that formulation with some crucial differences in mathematical formulation (but not in physical interpretation) as noted below, which lead to much more efficient inference algorithms. Later, we also consider some variations of the model.

### S1.1. Data

We assume that we measure a set of positions  $x_{tm}$  with associated uncertainties (variances of a Gaussian distribution)  $v_{tm}$ , where  $t = 1, 2, \dots, T$  describes time points in a trajectory, and  $m = 1, 2, \dots, \dim$  is the coordinate dimension. We allow for missing data points, which we keep track of with the indicator variable

$$o_t = \begin{cases} 1 & , \text{ if there is data at time } t, \\ 0 & , \text{ if not.} \end{cases} \quad (\text{S1})$$

As we will see, one can in practise dispense with  $o_t$  almost everywhere if missing data points are assigned the value  $v_{tm} \rightarrow \infty$ , so that  $1/v_{tm} = 0$ . Data in several dimensions are assumed independent, which among other things mean that we neglect correlations between the localization errors in different coordinates. The application we have in mind is mostly data sets consisting of many independent trajectories, but for notational simplicity we do the math for a single trajectory only, except when otherwise noted.

### S1.2. Equations of motion

*a. Hidden states*  $s_t \in \{1, 2, \dots, N\}$ ,  $t = 1, 2, \dots, T$ :

$$p(s_1) = \pi_{s_1}, \quad p(s_{t+1}|s_t) = A_{s_t, s_{t+1}}. \quad (\text{S2})$$

We follow recent versions of vbSPT [1] and parameterize  $A_{ij}$  in a form that makes it easier to formulate priors using physical insights about dwell times, and set

$$A_{ij} = \delta_{ij}(1 - a_i) + (1 - \delta_{ij})a_i B_{ij} = (1 - a_i)^{\delta_{ij}} a_i^{(1 - \delta_{ij})} B_{ij}^{(1 - \delta_{ij})}, \quad (\text{S3})$$

with constraints

$$0 \leq a_j \leq 1, \quad B_{ii} = 0, \quad \sum_{j \neq i} B_{ij} = 1. \quad (\text{S4})$$

This means that  $a_i = p(s_{t+1} \neq i | s_t = i)$  is the probability to exit state  $i$ , and  $B_{ij} = p(s_{t+1} = j | s_t = i, i \neq j)$  is a matrix of jump probabilities, conditional on a jump actually occurring. While, non-standard for HMMs, we believe that this allows for formulating prior distributions that are easier to interpret, and thus can be formulated with greater confidence. However, in Sec. S4.2 we show that a certain class of prior choices lead to algorithms that are mathematically equivalent to the more conventional formulation where  $A$  is explicitly kept as a model parameter.

*b. True diffusive path*

$$y_{t+1, m} = y_{tm} + \sqrt{\lambda_{s_t}} \varepsilon_{tm}, \quad \varepsilon_{tm} \in \mathcal{N}(0, 1) \text{ iid.}, \quad (\text{S5})$$

where  $\lambda_{s_t} = 2D_{s_t} \Delta t$  is the diffusive step-length variance.

*c. Measured and motion-averaged positions* We model two sources of position noise, motion blur and localization errors, by the equation

$$x_{tm} = \underbrace{\int_0^{\Delta t} f(t') y_m(t + t') dt'}_{\equiv z_{tm}} + \sqrt{v_{tm}} \xi_{tm}^{(x)}, \quad (\text{S6})$$

where  $y_m(t)$  is the continuous true diffusion path.

The first term  $z_{tm}$  represent the motion-averaged position, and can be rewritten in terms of the discrete true positions  $y_{tm}$  [3], as

$$z_{tm} = (1 - \tau)y_{tm} + \tau y_{t+1,m} + \sqrt{\beta\lambda_{s_t}}\zeta_{tm}. \quad (\text{S7})$$

Here,  $\tau$  and  $\beta = \tau(1 - \tau) - R$  are blur coefficients introduced in Ref. [3], and  $R$  is the original blur coefficient of Berglund [2]:

$$\tau = \frac{1}{\Delta t} \int_0^{\Delta t} f(t)t dt, \quad F(t) = \int_0^t f(t')dt', \quad R = \int_0^{\Delta t} F(t)(1 - F(t))dt, \quad (\text{S8})$$

where  $f(t)$  is the shutter function [2], which describes the distribution of emitted light in each exposure. For example, continuous exposure during a time  $t_E$  in the beginning of each frame ( $0 < t_E \leq \Delta t$ ) leads to [3]

$$f(t) = \begin{cases} \frac{1}{t_E}, & 0 \leq t \leq t_E, \\ 0, & t_E < t < \Delta t. \end{cases} \Rightarrow \tau = \frac{1}{2} \frac{t_E}{\Delta t}, \quad R = \frac{1}{6} \frac{t_E}{\Delta t}, \quad \beta = \frac{1}{4} \frac{t_E}{\Delta t} \left( \frac{4}{3} - \frac{t_E}{\Delta t} \right). \quad (\text{S9})$$

The second term in Eq. (S6) represents a localization error, and thus we can write the measured position as

$$x_{tm} = z_{tm} + \sqrt{v_{tm}}\xi_{tm}, \quad (\text{S10})$$

where  $v_t$  is the variance of the localization uncertainty at time  $t$ .

This formulation differs from our previous treatment [3] in that we do not integrate out  $z_{tm}$  at this point, although it can be done analytically. Instead, we keep both  $y_{tm}$  and  $z_{tm}$  as hidden path variables. While this doubles the number of Gaussian nuisance variables, it keeps the model in the exponential family, which leads to analytically tractable variational algorithms that allow a fully Bayesian treatment, large computational speed-ups, and treatment of several variant models, compared to our previous work.

*d. Model parameters*

$$\theta = \{\lambda, \pi, B, a\}. \quad (\text{S11})$$

### S1.3. Likelihood

Putting it all together, the complete data likelihood can be written

$$p(x, z, y, s | \pi, a, B, \lambda) = p(x|z)p(z|y, s, \lambda)p(y|s, \lambda)p(s|\pi, a, B), \quad (\text{S12})$$

with

$$\ln p(s|\pi, a, B) = \sum_{i=1}^N \delta_{i,s_1} \ln \pi_i \quad (\text{S13})$$

$$+ \sum_{t=1}^{T-1} \sum_{k,j=1}^N \delta_{k,s_t} \delta_{j,s_{t+1}} \left[ \delta_{kj} \ln(1 - a_k) + (1 - \delta_{kj}) \ln a_k + (1 - \delta_{kj}) \ln B_{kj} \right], \quad (\text{S14})$$

$$\ln p(y|s, \lambda) = -\frac{1}{2} \sum_{t=1}^T \sum_{k=1}^N \sum_{m=1}^{\dim} \delta_{ks_t} \left( \ln(2\pi\lambda_k) + \lambda_k^{-1} (y_{t+1,m} - y_{tm})^2 \right), \quad (\text{S15})$$

$$\ln p(z|y, s, \lambda) = -\frac{1}{2} \sum_{t=1}^T \sum_{k=1}^N \sum_{m=1}^{\dim} \delta_{ks_t} \left( \ln(2\pi\beta\lambda_k) + (\beta\lambda_k)^{-1} (z_{tm} - (1 - \tau)y_{tm} - \tau y_{t+1,m})^2 \right), \quad (\text{S16})$$

$$\ln p(x|z) = -\frac{1}{2} \sum_{t=1}^T \sum_{m=1}^{\dim} o_t \left( \ln(2\pi v_{tm}) + v_{tm}^{-1} (x_{tm} - z_{tm})^2 \right). \quad (\text{S17})$$

## S2. INFERENCE, MODEL SELECTION, AND VARIATIONAL APPROXIMATIONS

### S2.1. Maximum evidence and Variational Bayes inference

In a pure Bayesian treatment [4], we add prior distributions  $p(\theta|M) \equiv p_0(\theta)$  on the parameter values (conditional on model structure,  $M$ ), and compute the evidence  $p(x|M)$  for different models by integrating out both parameters and unobserved (nuisance) variables in the complete data likelihood,

$$p(x|M) = \int dz dy d\theta \sum_s p(x, z, y, s|\theta) p_0(\theta). \quad (\text{S18})$$

This marginalization is intractable for our model, but we can make a mean-field approximation [4], and write

$$\ln p(x|M) \geq \ln L = \int dz dy d\theta \sum_s q(s)q(y, z)q(\theta) \ln \frac{p(x, z, y, s|\theta)p_0(\theta)}{q(s)q(y, z)q(\theta)}, \quad (\text{S19})$$

where the inequality follows from Jensen's inequality, and  $q(s)$ ,  $q(y, z)$ ,  $q(\theta)$  are arbitrary variational distributions, that we will optimize to maximize the lower bound  $\ln L$ , which is the mean-field approximation of  $\ln L$ . Using functional differentiation, and enforcing a normalization constraints of the variational distributions while optimizing  $\ln L$ , we get the variational equations

$$\ln q(\theta) = -\ln Z_\theta + \ln p_0(\theta) + \langle \ln p(s|\theta) \rangle_{q(s)} + \langle \ln p(y|s, \theta) \rangle_{q(s)q(y, z)} + \langle \ln p(z|s, y, \theta) \rangle_{q(s)q(y, z)}, \quad (\text{S20})$$

$$\ln q(s) = -\ln Z_s + \langle \ln p(s|\theta) \rangle_{q(\theta)} + \langle \ln p(y|s, \theta) \rangle_{q(\theta)q(y, z)} + \langle \ln p(z|y, s, \theta) \rangle_{q(\theta)q(y, z)}, \quad (\text{S21})$$

$$\ln q(y, z) = -\ln Z_{yz} + \langle \ln p(y|s, \theta) \rangle_{q(s)q(\theta)} + \langle \ln p(z|y, s, \theta) \rangle_{q(s)q(\theta)}, + \ln p(x|z), \quad (\text{S22})$$

which we solve iteratively. From the likelihood terms one can see that a suitably factorized prior will lead to factorization of the entire variational parameter distributions. We will assume such a prior structure, and furthermore choose the functional forms of conjugate priors [4, 5] for computational tractability. We will also sometimes drop subscripts from the average brackets  $\langle \cdot \rangle$  in unambiguous cases.

To actually compute the lower bound, we substitute the results of the variational updates back into  $\ln L$ . The result is especially convenient just after updating  $q(s)$ , in which case a lot of terms cancel, and we end up with

$$\ln L = \ln Z_s + \left\langle \ln \frac{p(x|z)}{q(y, z)} \right\rangle_{q(y, z)} + \left\langle \ln \frac{p_0(\theta)}{q(\theta)} \right\rangle_{q(\theta)}. \quad (\text{S23})$$

The model selection criterion is then to prefer the model with the highest likelihood (or lower bound), or interpret  $e^{\ln L}$  or  $e^F$  as proportional to the posterior probability that the model is true. The variational distributions can also be used for (approximate) inference about the parameters and hidden states and paths.

### S2.2. Maximum a posteriori estimates (MAP)

Instead of integrating over the parameters, maximum a posteriori inference simply seek parameter values that maximize the likelihood,

$$\ln L = \max_\theta \ln \int dz dy \sum_s p(x, z, y, s|\theta) p_0(\theta). \quad (\text{S24})$$

To derive approximate maximum likelihood inference, we make a variational ansatz with only  $q(s)$  and  $q(y, z)$ , and write

$$\ln L = \max_\theta \int dz dy \sum_s q(s)q(y, z) \ln \frac{p(x, z, y, s|\theta)p_0(\theta)}{q(s)q(y, z)}, \quad (\text{S25})$$

and maximize w.r.t.  $q(s)$ ,  $q(y, z)$ , and  $\theta$ , to get

$$\theta_{MAP} = \operatorname{argmax}_\theta \left[ \ln p_0(\theta) + \langle \ln p(s|\theta) \rangle_{q(s)} + \langle \ln p(y|s, \theta) \rangle_{q(s)q(y, z)} + \langle \ln p(z|s, y, \theta) \rangle_{q(s)q(y, z)} \right], \quad (\text{S26})$$

$$\ln q(s) = -\ln Z_s + \ln p(s|\theta) + \langle \ln p(y|s, \theta) \rangle_{q(y, z)} + \langle \ln p(z|y, s, \theta) \rangle_{q(y, z)}, \quad (\text{S27})$$

$$\ln q(y, z) = -\ln Z_{yz} + \langle \ln p(y|s, \theta) \rangle_{q(s)q(\theta)} + \langle \ln p(z|y, s, \theta) \rangle_{q(s)q(\theta)}, + \ln p(x|z). \quad (\text{S28})$$

After updating  $q(s)$ , the lower bound is given by

$$\ln L = \ln Z_s + \left\langle \ln \frac{p(x|z)}{q(y,z)} \right\rangle_{q(y,z)} + \ln p_0(\theta_{MAP}). \quad (\text{S29})$$

### S2.3. Maximum likelihood estimates (MLE)

The Maximum likelihood estimate (MLE) is like MAP, but with priors removed. In practice, we will use MLE rather than MAP, but note that MAP inference might offer a way to numerically stabilize MLE in a principled way.

### S2.4. Cross-validation with point-estimates

An alternative to using the Bayesian maximum evidence criterion for model selection, is to estimate the predictive performance of a model. This means that we imagine ensembles of training and validation data sets  $X_T$  and  $X_V$ , and seek to maximize

$$\ln P = \langle \ln p(X_V | X_T, M) \rangle_{X_V, X_T}, \quad (\text{S30})$$

where the expectation is to be computed with respect to the true distribution of training and validation data sets. Training and validation data is assumed to be identically distributed (except for possibly being of different size), and their true distribution are not necessarily known, or part of the set of candidate models. The conditional dependence in Eq. (S30) should be interpreted as learning the model (integrating/maximizing parameters, and integrating out nuisance variables  $y, z, s$ ) based on the training data.

In practice, we do not have an infinite amount of validation and training data, and instead divide out existing data sets into  $K$  different partitions  $\{(x_V^{(1)}, x_T^{(1)}), (x_V^{(2)}, x_T^{(2)}), \dots, (x_V^{(K)}, x_T^{(K)})\}$ , and approximate the predictive performance by an average,

$$\langle \ln p(X_V | X_T, M) \rangle_{X_V, X_T} \approx \frac{1}{K} \sum_{j=1}^K \ln p(x_V^{(j)} | x_T^{(j)}, M) \quad (\text{S31})$$

In practice, for each partition we learn (using MLE or MAP) a set of parameters  $\theta_T^{(j)} = \theta(x_T^{(j)})$ , and use

$$\ln p(x_V^{(j)} | x_T^{(j)}, M) = \ln p(x_V^{(j)} | \theta_T^{(j)}, M) = \ln \int dy_V dz_V \sum_{s_V} p(x_V^{(j)}, z_V^{(j)}, y_V^{(j)}, s_V^{(j)} | \theta_T^{(j)}, M) \quad (\text{S32})$$

and do the marginalizations of  $y_V, z_V, s_V$  using the same variational approximation as the inference, but exclude explicit contributions from the prior to the predictive likelihood.

There is some freedom in choosing the size of the training and validation data sets, and to be able to compare different choices, some normalization may be in order. The question is further complicated by the fact that the statistically independent atoms of single particle tracking is (to good approximation) single trajectories, not single coordinate observations, and single trajectories vary in length.

LaMont and Wiggins [6] suggested normalizing data sets of independent observations to the size of the full data set. In our setting, this probably means rescaling the predictive performance of each validation set to the total data set size,

$$\hat{H}_{CV}(M) = \frac{1}{K} \sum_{j=1}^K \frac{N_V^{(j)} + N_T^{(j)}}{N_V^{(j)}} \ln p(x_V^{(j)} | \theta_T^{(j)}, M) = \frac{N}{K} \sum_{j=1}^K \frac{1}{N_V^{(j)}} \ln p(x_V^{(j)} | \theta_T^{(j)}, M), \quad (\text{S33})$$

where  $N_{\dots}$  means the number of coordinates (including missing positions) in the training/validation data sets, and  $N = N_T + N_V$  if we always partition the data so that each data point is used exactly once. Equivalently, we could rescale to compute the predictive performance per observed position.



### S2.5. Pseudo-Bayes factors

A Bayesian version of cross-validation is to include marginalization over parameters as well in the predictive performance [7]. In particular, we use the parameter posterior from the training set as a prior in evaluating the performance on the validation set. For brevity, we use the more compact notation

$$S_T = (z_T, y_T, s_T), \quad S_V = (z_V, y_V, s_V), \quad S = (z, y, s), \quad (\text{S34})$$

$$\int dS_T = \int dy_T dz_T \sum_{s_T}, \quad \int dS_V = \int dy_V dz_V \sum_{s_V}, \quad \int dS = \int dy dz \sum_s, \quad (\text{S35})$$

and the pseudo-Bayes factor for a single training-validation partition is then given by

$$\begin{aligned} \ln P_{PBF}(x_V^{(j)}, x_T^{(j)}) &= \ln \frac{\int dS_V^{(j)} dS_T^{(j)} d\theta p(x_V^{(j)}, S_V^{(j)} | \theta) p(x_T^{(j)}, S_T^{(j)} | \theta) p_0(\theta)}{\int dS_T^{(j)} d\theta' p(x_T^{(j)}, S_T^{(j)} | \theta') p_0(\theta')} \\ &= \ln \int dS_V^{(j)} dS_T^{(j)} d\theta p(x_V^{(j)}, S_V^{(j)} | \theta) p(x_T^{(j)}, S_T^{(j)} | \theta) p_0(\theta) - \ln \int dS_T^{(j)} d\theta p(x_T^{(j)}, S_T^{(j)} | \theta) p_0(\theta) \\ &= \ln p(x_V^{(j)}, x_T^{(j)} | M) - \ln p(x_T^{(j)} | M) = \ln p(x | M) - \ln p(x_T^{(j)} | M) \approx \ln L[x] - \ln L[x_T^{(j)}]. \end{aligned} \quad (\text{S36})$$

that is, the difference log evidence between the total and training data. On the other hand, one could also approximate the training posterior by the variational parameter distributions from the training set,

$$\frac{\int dS_T^{(j)} p(x_T^{(j)}, S_T^{(j)} | \theta) p_0(\theta)}{\int dS_T^{(j)} d\theta' p(x_T^{(j)}, S_T^{(j)} | \theta') p_0(\theta)} \approx q(\theta; x_T^{(j)}) \equiv q_T^{(j)}(\theta), \quad (\text{S37})$$

which means that this approximate posterior is used as the prior for evaluating the validation set,

$$\ln P_{PBF}(x_V^{(j)}, x_T^{(j)}) \approx \ln L[x_V^{(j)}; q_T^{(j)}(\theta)]. \quad (\text{S38})$$

It is not quite clear which of these approximations is preferred theoretically. The lower bound difference of Eq. (S36) seems more systematic in that it only approximates integrals with no reference to additional probabilistic interpretations. On the other hand, the variational posterior, Eq. (S37), represents the approximate the Bayesian predictive distribution available for practical use [4, 5], and hence is arguably a reasonable choice for assessing predictive performance. Numerically, using the variational parameter posterior avoids potential cancellation problems inherent in computing small differences between large numbers. Since the validation data sets will in general be smaller than the training sets, the extra computational cost of converging both training and validation sets (as opposed to only the training set, since the full data set is already converged) should be negligible. As for cross-validation, we compute an average over many partitions,

$$\hat{H}_{PBF}(M) \approx \frac{N}{K} \sum_{j=1}^K \frac{1}{N_V} \ln P_{PBF}(x_V^{(j)}, x_T^{(j)}) \quad (\text{S39})$$

and also normalize by validation set size in case of varying trajectory lengths. In order to generate the predictive/AIC limit asymptotically, the validation sets should be chosen to be small [6, 7]. On the other hand, small validation data sets means higher statistical errors in  $\hat{H}_{PBF}$ .

## S3. VARIATIONAL BAYES ALGORITHM

### S3.1. Initial state and transition probabilities

The variational equations for the parameters governing the hidden states are

$$\ln q(\pi_m) = -\ln Z_\pi + \ln p_0(\pi_m) + \langle \delta_{m, s_1} \rangle \ln \pi_m, \quad (\text{S40})$$

$$\ln q(a_k) = -\ln Z_a + \ln p_0(a_k) + \ln(1 - a_k) \sum_{t=1}^{T-1} \langle \delta_{k, s_t} \delta_{k, s_{t+1}} \rangle + \ln a_k \sum_{t=1}^{T-1} (1 - \langle \delta_{k, s_t} \delta_{k, s_{t+1}} \rangle), \quad (\text{S41})$$

$$\ln q(B_{kj}) = -\ln Z_{B, k} + \ln B_{kj} \sum_{t=1}^{T-1} \langle \delta_{k, s_t} \delta_{j, s_{t+1}} \rangle, \quad k \neq j. \quad (\text{S42})$$

Except for the summation bounds on  $t$ , this is the same as in vbSPT [1, software documentation], and all relevant statistics are given in the count matrix

$$\hat{w}_{ij} = \sum_{t=1}^{T-1} \langle \delta_{k,s_t} \delta_{j,s_{t+1}} \rangle \quad (\text{S43})$$

and expected occupancy  $\langle \delta_{i,s_t} \rangle$ . Using conjugate priors,  $\pi$  and the rows (minus diagonal elements) of  $B$  get Dirichlet distributions, while each  $a_k$  is beta distributed (the 2-component Dirichlet).

$$q(\pi) = \text{Dir}(\pi|w^{(\pi)}), \quad w_j^{(\pi)} = \tilde{w}_j^{(\pi)} + \langle \delta_{j,s_1} \rangle, \quad (\text{S44})$$

$$q(B) = \prod_{j=1}^N \text{Dir}(B_{j,:}|w_{j,:}^{(B)}), \quad w_{jk}^{(B)} = \tilde{w}_{jk}^{(B)} + \hat{w}_{ij}, \quad (k \neq j), \quad (\text{S45})$$

$$\begin{aligned} q(a) &= \prod_{j=1}^N \beta(a_j|w_{j1}^{(a)}, w_{j2}^{(a)}), \quad w_{j1}^{(a)} = \tilde{w}_{j1}^{(a)} + \sum_{t=1}^{T-1} \langle \delta_{j,s_t} (1 - \delta_{j,s_{t+1}}) \rangle = \tilde{w}_{j1}^{(a)} + \sum_{k \neq j} \hat{w}_{jk}, \\ w_{j2}^{(a)} &= \tilde{w}_{j2}^{(a)} + \sum_{t=1}^{T-1} \langle \delta_{j,s_t} \delta_{j,s_{t+1}} \rangle = \tilde{w}_{j2}^{(a)} + \hat{w}_{jj}, \end{aligned} \quad (\text{S46})$$

with where  $\tilde{w}_j^{(\pi)}$ ,  $\tilde{w}_{jk}^{(B)}$ , and  $\tilde{w}_{jk}^{(a)}$  are pseudo-counts in the prior distributions. The total number of pseudo-counts (for each distribution) is called the prior strength and denoted  $w_0^{(\cdot)} = \sum_k w_k^{(\cdot)}$ .

The Dirichlet density function, in this case for a vector  $\mathbf{x}$ , is

$$\text{Dir}(\mathbf{x}|\mathbf{w}) = \frac{1}{B(\mathbf{w})} = \prod_j x_j^{(w_j-1)}, \quad B(\mathbf{w}) = \frac{\prod_j \Gamma(w_j)}{\Gamma(w_0)}, \quad w_0 = \sum_k w_k \quad (\text{S47})$$

with the constraints  $0 \leq x_j \leq 1$  and  $\sum_j x_j = 1$ . The beta distribution is the special case of two components ( $x$  and  $1 - x$ ),

$$\beta(x|u, v) = \frac{\Gamma(u+v)}{\Gamma(u)\Gamma(v)} x^{u-1} (1-x)^{v-1}. \quad (\text{S48})$$

The following average and mode values will be needed:

$$\langle \ln \pi_i \rangle = \psi(w_i^{(\pi)}) - \psi(w_0^{(\pi)}), \quad w_0^{(\pi)} = \sum_{i=1}^N w_i^{(\pi)}, \quad (\text{S49})$$

$$\langle \ln a_j \rangle = \psi(w_{j1}^{(a)}) - \psi(w_{j0}^{(a)}), \quad w_{j0}^{(a)} = w_{j1}^{(a)} + w_{j2}^{(a)}, \quad (\text{S50})$$

$$\langle \ln(1 - a_j) \rangle = \psi(w_{j2}^{(a)}) - \psi(w_{j0}^{(a)}), \quad (\text{S51})$$

$$\langle \ln B_{jk} \rangle = \psi(w_{jk}^{(B)}) - \psi(w_{j0}^{(B)}), \quad w_{j0}^{(B)} = \sum_{k=1, k \neq j}^N w_{jk}^{(B)}, \quad (\text{S52})$$

Some additional variational mode\*,  $\langle \text{mean} \rangle$  and variances are

$$\pi_i^* = \frac{w_i^{(\pi)} - 1}{w_0^{(\pi)} - N}, \quad \langle \pi_i \rangle = \frac{w_i^{(\pi)}}{w_0^{(\pi)}}, \quad \text{Var}[\pi_i] = \frac{w_i^{(\pi)}(w_0^{(\pi)} - w_i^{(\pi)})}{(w_0^{(\pi)})^2(w_0^{(\pi)} + 1)}, \quad (\text{S53})$$

$$a_i^* = \frac{w_{i1}^{(a)} - 1}{w_{i0}^{(a)} - 2}, \quad \langle a_i \rangle = \frac{w_{i1}^{(a)}}{w_{i0}^{(a)}}, \quad \text{Var}[a_j] = \frac{w_{j1}^{(a)}w_{j2}^{(a)}}{(w_{j0}^{(a)})^2(1 + w_{j1}^{(a)})}, \quad (\text{S54})$$

$$(1 - a_i)^* = \frac{w_{i2}^{(a)} - 1}{w_{i0}^{(a)} - 2}, \quad \langle 1 - a_i \rangle = \frac{w_{i2}^{(a)}}{w_{i0}^{(a)}}, \quad \text{Var}[1 - a_j] = \text{Var}[a_j] \quad (\text{S55})$$

$$B_{jk}^* = \frac{w_{jk}^{(B)} - 1}{w_{j0}^{(B)} - N + 1}, \quad \langle B_{jk} \rangle = \frac{w_{jk}^{(B)}}{w_{j0}^{(B)}}, \quad \text{Var}[B_{jk}] = \frac{w_{jk}^{(B)}(w_{j0}^{(B)} - w_{jk}^{(B)})}{(w_{j0}^{(B)})^2(1 + w_{j0}^{(B)})}, \quad (\text{S56})$$

$$A_{jj}^* = ???, \quad \langle A_{jj} \rangle = \langle 1 - a_j \rangle, \quad (\text{S57})$$

$$A_{jk}^* = ???, \quad \langle A_{jk} \rangle = \langle a_i \rangle \langle B_{jk} \rangle. \quad (\text{S58})$$

The variational distributions of  $a, B$  induces a joint distribution on  $A$ , which can be written (for row  $i$ ), as

$$q(A_{i,:})dA_{i,:} = q_a(a_i(A_{i,:}))q_B(B_{i,:}(A_{i,:})) \left| \frac{\partial(a_i, B_{i,:})}{\partial A_{i,:}} \right| dA_{i,:} \quad (\text{S59})$$

This is difficult to do analytically, and we leave the posterior mode of the transition matrix unknown.

### S3.2. Dwell times

Mean dwell times (in units of  $\Delta t$ ) is  $\tau_j = a_j^{-1}$ . This gives the variational density function

$$q(\tau_j) = q(a_j(\tau_j)) \left| \frac{da_j}{d\tau_j} \right| = \frac{\Gamma(w_{j1}^{(\mathbf{a})})\Gamma(w_{j2}^{(\mathbf{a})})}{\Gamma(w_{j0}^{(\mathbf{a})})} \tau_j^{-w_{j0}^{(\mathbf{a})}} (\tau_j - 1)^{w_{j2}^{(\mathbf{a})} - 1}, \quad \tau_j \geq 1, \quad (\text{S60})$$

which means that

$$\langle \tau_j \rangle = \langle a_j^{-1} \rangle = \frac{w_{j0}^{(\mathbf{a})}}{w_{j1}^{(\mathbf{a})}} = \frac{1}{\langle a_j \rangle}, \quad (\text{S61})$$

$$\tau_j^* = \frac{w_{j0}^{(\mathbf{a})}}{1 + w_{j1}^{(\mathbf{a})}}, \quad (\text{S62})$$

$$\langle \tau_j^2 \rangle = \langle a_j^{-2} \rangle_{q(\mathbf{a})} = \langle \tau_j \rangle \frac{w_{j0}^{(\mathbf{a})} - 1}{w_{j1}^{(\mathbf{a})} - 1} = \langle \tau_j \rangle^2 \frac{w_{j0}^{(\mathbf{a})} - 1}{w_{j0}^{(\mathbf{a})} - \langle \tau_j \rangle}, \quad (\text{S63})$$

$$\text{Var}(\tau_j) = \langle \tau_j^2 \rangle - \langle \tau_j \rangle^2 = \frac{\langle \tau_j \rangle^2 (\langle \tau_j \rangle - 1)}{w_{j0}^{(\mathbf{a})} - \langle \tau_j \rangle}. \quad (\text{S64})$$

or

$$w_{j1}^{(\mathbf{a})} = \frac{w_{j0}^{(\mathbf{a})}}{\langle \tau_j \rangle} = 1 + \frac{\langle \tau_j \rangle (\langle \tau_j \rangle - 1)}{\text{Var}(\tau_j)},$$

$$w_{j2}^{(\mathbf{a})} = w_{j0}^{(\mathbf{a})} \frac{\langle \tau_j \rangle - 1}{\langle \tau_j \rangle} = (\langle \tau_j \rangle - 1)w_{j1}^{(\mathbf{a})}. \quad (\text{S65})$$

### S3.3. Step variance

$$\ln q(\lambda_k) = -\ln Z_\lambda + \ln p_0(\lambda_k) - \frac{1}{2} \sum_{t=1}^T \sum_{m=1}^{\dim} \langle \delta_{ks_t} \rangle \left( 2 \ln \lambda_k + \lambda_k^{-1} \left[ \langle (y_{t+1,m} - y_{tm})^2 \rangle + \beta^{-1} \langle (z_{tm} - (1-\tau)y_{tm} - \tau y_{t+1,m})^2 \rangle \right] \right). \quad (\text{S66})$$

If the prior is inverse gamma, then so is  $q(\lambda_k)$ :

$$q(\lambda_k) = \frac{c_k^{n_k}}{\Gamma(n_k)} \lambda_k^{-n_k-1} e^{-c_k/\lambda_k}. \quad (\text{S67})$$

with

$$n_k = \tilde{n}_k + \hat{n}_k, \quad c_k = \tilde{c}_k + \hat{c}_k. \quad (\text{S68})$$

Here,  $\tilde{n}_k, \tilde{c}_k$  are prior parameters, and the data-dependent terms are given by

$$\hat{n}_k = \dim \times \sum_{t=1}^T \langle \delta_{ks_t} \rangle, \quad (\text{S69})$$

and

$$\hat{c}_k = \frac{1}{2} \sum_{t=1}^T \langle \delta_{ks_t} \rangle \sum_{m=1}^{\dim} \left\{ \left( \langle y_{t+1,m} \rangle - \langle y_{tm} \rangle \right)^2 + \beta^{-1} \left( \langle z_{tm} \rangle - (1-\tau) \langle y_{tm} \rangle - \tau \langle y_{t+1,m} \rangle \right)^2 + (1 + \beta^{-1}(1-\tau)^2) \Sigma_{y_{tm}, y_{tm}} + (1 + \beta^{-1}\tau^2) \Sigma_{y_{t+1,m}, y_{t+1,m}} + \beta^{-1} \Sigma_{z_{tm}, z_{tm}} - \underbrace{2(1 - \beta^{-1}\tau(1-\tau))}_{=2R/\beta} \Sigma_{y_{tm}, y_{t+1,m}} - 2\beta^{-1}(1-\tau) \Sigma_{z_{tm}, y_{tm}} - 2\beta^{-1}\tau \Sigma_{z_{tm}, y_{t+1,m}} \right\}, \quad (\text{S70})$$

where  $\Sigma$  are joint covariance matrices of  $q(y_{:,m}, z_{:,m})$ . We need the following averages (dropping the subscript):

$$\langle \lambda \rangle = \frac{c}{n-1}, \quad (\text{S71})$$

$$\text{std}[\lambda] = \frac{c}{(n-1)\sqrt{n-2}}, \quad (\text{S72})$$

$$\langle \lambda^{-1} \rangle = \frac{n}{c}, \quad (\text{S73})$$

$$\langle \ln \lambda \rangle = \ln c - \psi(n), \quad (\text{S74})$$

$$\lambda^* = \frac{c}{n+1}, \quad (\text{S75})$$

Here,  $\psi$  is the digamma function, and the asterisk  $*$  denotes the mode (most likely value). Since  $\lambda = 2D\Delta t$ , the variational distribution for the diffusion constant is

$$q(D_k) = \frac{(c_k/2\Delta t)^{n_k}}{\Gamma(n_k)} D_k^{-n_k-1} e^{-(c_k/2\Delta t)/D_k}, \quad (\text{S76})$$

i.e.,  $D$  is also inverse gamma, with

$$c_k^{(D)} = c_k^{(\lambda)}/2\Delta t, \quad n_k^{(D)} = n_k^{(\lambda)}. \quad (\text{S77})$$

### S3.4. Hidden states

$$\ln q(s) = -\ln Z_s + \sum_{i=1}^N \delta_{i,s_1} \langle \ln \pi_i \rangle \quad (\text{S78})$$

$$+ \sum_{t=1}^{T-1} \sum_{k,j=1}^N \delta_{k,s_t} \delta_{j,s_{t+1}} \left[ \delta_{kj} \langle \ln(1-a_k) \rangle + (1-\delta_{kj}) \langle \ln a_k \rangle + (1-\delta_{kj}) \langle \ln B_{kj} \rangle \right] \quad (\text{S79})$$

$$- \frac{1}{2} \sum_{t=1}^T \sum_{i=1}^N \sum_{m=1}^{\dim} \delta_{is_t} \left[ \langle \ln(\lambda_i) \rangle + \langle \lambda_i^{-1} \rangle \langle (y_{tm} - y_{t+1,m})^2 \rangle \right] \quad (\text{S80})$$

$$- \frac{1}{2} \sum_{t=1}^T \sum_{i=1}^N \sum_{m=1}^{\dim} \delta_{is_t} \left[ \langle \ln(\lambda_i) \rangle + \beta^{-1} \langle \lambda_i^{-1} \rangle \langle (z_{tm} - (1-\tau)y_{tm} - \tau y_{t+1,m})^2 \rangle \right] \quad (\text{S81})$$

$$= -\ln Z_s + \sum_{t=1}^{T-1} \sum_{k,j=1}^N \delta_{k,s_t} \delta_{j,s_{t+1}} \ln Q_{jk} + \sum_{t=1}^T \sum_{i=1}^N \delta_{is_t} \ln H_{ti}, \quad (\text{S82})$$

with

$$\ln Q_{kj} = \delta_{kj} \langle \ln(1-a_k) \rangle + (1-\delta_{kj}) \left[ \langle \ln a_k \rangle + \langle \ln B_{kj} \rangle \right], \quad (\text{S83})$$

$$\ln H_{ti} = \delta_{1t} \langle \ln \pi_i \rangle - \dim \times \langle \ln(\lambda_i) \rangle \quad (\text{S84})$$

$$- \frac{1}{2} \langle \lambda_i^{-1} \rangle \sum_{m=1}^{\dim} \left\{ \left( \langle y_{t+1,m} \rangle - \langle y_{tm} \rangle \right)^2 + \beta^{-1} \left( \langle z_{tm} \rangle - (1-\tau) \langle y_{tm} \rangle - \tau \langle y_{t+1,m} \rangle \right)^2 \right\} \quad (\text{S85})$$

$$+ \left( 1 + \frac{(1-\tau)^2}{\beta} \right) \Sigma_{y_{tm} y_{tm}} + \left( 1 + \frac{\tau^2}{\beta} \right) \Sigma_{y_{t+1,m} y_{t+1,m}} + \frac{1}{\beta} \Sigma_{z_{tm} z_{tm}} \quad (\text{S86})$$

$$\underbrace{- 2 \left( 1 - \frac{\tau(1-\tau)}{\beta} \right) \Sigma_{y_{tm} y_{t+1,m}} - 2 \frac{1-\tau}{\beta} \Sigma_{y_{tm} z_{tm}} - \frac{2\tau}{\beta} \Sigma_{y_{t+1,m} z_{tm}}}_{=2R/\beta} \quad (\text{S87})$$

Averages  $\langle \delta_{j,s_t} \rangle$ ,  $\sum_{t=1}^{T-1} \langle \delta_{k,s_t} \delta_{j,s_{t+1}} \rangle$ , and the normalization constant  $\ln Z_s$  are computed with the standard forward-backward algorithm.

### S3.5. Hidden trajectories

$$\begin{aligned} \ln q(y, z) = \text{const.} &- \frac{1}{2} \sum_{t=1}^T \sum_{m=1}^{\dim} o_t \frac{(x_{tm} - z_{tm})^2}{v_{tm}} - \frac{1}{2} \sum_{t=1}^T \sum_{i=1}^N \sum_{m=1}^{\dim} \langle \delta_{is_t} \rangle \langle \lambda_i^{-1} \rangle (y_{t+1,m} - y_{tm})^2 \\ &- \frac{1}{2} \sum_{t=1}^T \sum_{i=1}^N \sum_{m=1}^{\dim} \langle \delta_{is_t} \rangle \langle (\beta \lambda_i)^{-1} \rangle (z_{tm} - (1-\tau)y_{tm} - \tau y_{t+1,m})^2 \end{aligned} \quad (\text{S88})$$

This is a product of  $\dim$  multivariate normals. We introduce an effective step variance defined by

$$\frac{1}{\alpha_t} = \sum_{i=1}^N \langle \delta_{is_t} \rangle \langle \lambda_i^{-1} \rangle, \quad (\text{S89})$$

and expand:

$$\begin{aligned}
\ln q(y, z) &= \text{const.} - \frac{1}{2} \sum_{t=1}^T \sum_{m=1}^{\dim} \left\{ \frac{o_t}{v_{tm}} x_{tm}^2 + \frac{o_t}{v_{tm}} z_{tm}^2 - 2 \frac{o_t}{v_{tm}} x_{tm} z_{tm} + \frac{y_{tm}^2}{\alpha_t} + \frac{y_{t+1,m}^2}{\alpha_t} - 2 \frac{y_{tm} y_{t+1,m}}{\alpha_t} \right. \\
&\quad \left. + \frac{z_{tm}^2}{\beta \alpha_t} + \frac{(1-\tau)^2}{\beta \alpha_t} y_{tm}^2 + \frac{\tau^2}{\beta \alpha_t} y_{t+1,m}^2 - 2 \frac{1-\tau}{\beta \alpha_t} y_{tm} z_{tm} - 2 \frac{\tau}{\beta \alpha_t} y_{t+1,m} z_{tm} + 2 \frac{\tau(1-\tau)}{\beta \alpha_t} y_{tm} y_{t+1,m} \right\} \\
&= \text{const.} - \frac{1}{2} \sum_{t=1}^T \sum_{m=1}^{\dim} \left\{ \left(1 + \frac{(1-\tau)^2}{\beta}\right) \frac{y_{tm}^2}{\alpha_t} + \left(1 + \frac{\tau^2}{\beta}\right) \frac{y_{t+1,m}^2}{\alpha_t} + 2 \underbrace{\left(\frac{\tau(1-\tau)}{\beta} - 1\right)}_{=R/\beta} \frac{y_{tm} y_{t+1,m}}{\alpha_t} \right. \\
&\quad \left. - 2 \frac{1-\tau}{\beta \alpha_t} y_{tm} z_{tm} - 2 \frac{\tau}{\beta \alpha_t} y_{t+1,m} z_{tm} + \left(\frac{o_t}{v_{tm}} + \frac{1}{\beta \alpha_t}\right) z_{tm}^2 - 2 \frac{o_t}{v_{tm}} x_{tm} z_{tm} + \frac{o_t}{v_{tm}} x_{tm}^2 \right\}. \quad (\text{S90})
\end{aligned}$$

Written in matrix notation, with

$$z_m = [z_{1m}, z_{2m}, \dots, z_{Tm}]^\dagger, \quad y_m = [y_{1m}, y_{2m}, \dots, y_{Tm}, y_{T+1,m}]^\dagger, \quad (\text{S91})$$

we have

$$\ln q(y, z) = \text{const.} - \frac{1}{2} \sum_{m=1}^{\dim} \left\{ [y_m^\dagger, z_m^\dagger] \begin{bmatrix} A_{yy} & -A_{yz} \\ -A_{yz}^\dagger & A_{zzm} \end{bmatrix} \begin{bmatrix} y_m \\ z_m \end{bmatrix} - 2 \left[ 0, x_m^\dagger V_m \right] \begin{bmatrix} y_m \\ z_m \end{bmatrix} \right\}, \quad (\text{S92})$$

with  $A_{yy} \in \mathbf{R}^{(T+1) \times (T+1)}$ ,  $A_{yz} \in \mathbf{R}^{(T+1) \times T}$ , and  $A_{zz} \in \mathbf{R}^{T \times T}$ , given by

$$A_{yy} = \begin{bmatrix} \frac{1}{\alpha_1} \left(1 + \frac{(1-\tau)^2}{\beta}\right) & & \frac{R}{\beta \alpha_1} & & 0 & & \dots & & \\ & \frac{R}{\beta \alpha_1} & \frac{1}{\alpha_2} \left(1 + \frac{(1-\tau)^2}{\beta}\right) + \frac{1}{\alpha_1} \left(1 + \frac{\tau^2}{\beta}\right) & & \dots & & & & \\ & 0 & & \ddots & & & & & \\ \vdots & & & & & & & & \\ & & & & & \frac{1}{\alpha_T} \left(1 + \frac{(1-\tau)^2}{\beta}\right) + \frac{1}{\alpha_{T-1}} \left(1 + \frac{\tau^2}{\beta}\right) & & \frac{R}{\beta \alpha_T} & \\ & & & & & \frac{R}{\beta \alpha_T} & & \frac{1}{\alpha_T} \left(1 + \frac{\tau^2}{\beta}\right) & \end{bmatrix}, \quad (\text{S93})$$

and

$$A_{yz} = \frac{1}{\beta} \begin{bmatrix} \frac{1-\tau}{\alpha_1} & 0 & 0 & \dots & \\ \frac{\tau}{\alpha_1} & \frac{1-\tau}{\alpha_2} & 0 & & \\ 0 & \frac{\tau}{\alpha_2} & \frac{1-\tau}{\alpha_3} & 0 & \\ 0 & 0 & \frac{\tau}{\alpha_3} & & \\ \vdots & & & \ddots & \\ & & & & \frac{1-\tau}{\alpha_T} \\ & & & & \frac{\tau}{\alpha_T} \end{bmatrix}, \quad (\text{S94})$$

$$A_{zzm} = \text{diag} \left( \left[ \frac{o_1}{v_{1m}} + \frac{1}{\beta \alpha_1}, \frac{o_2}{v_{2m}} + \frac{1}{\beta \alpha_2}, \dots, \frac{o_T}{v_{Tm}} + \frac{1}{\beta \alpha_T} \right] \right), \quad (\text{S95})$$

$$V_m = \text{diag} \left( \left[ \frac{o_1}{v_{1m}}, \frac{o_2}{v_{2m}}, \dots, \frac{o_T}{v_{Tm}} \right] \right). \quad (\text{S96})$$

Finally, we rewrite  $\ln q(y, z)$  in the canonical form for multivariate normal distributions,

$$\ln q(y, z) = -\ln Z_{yz} - \frac{1}{2} \sum_{m=1}^{\dim} [y_m^\dagger - \langle y_m \rangle^\dagger, z_m^\dagger - \langle z_m \rangle^\dagger] \begin{bmatrix} \Sigma_{yym} & \Sigma_{yzm} \\ \Sigma_{yzm}^\dagger & \Sigma_{zzm} \end{bmatrix}^{-1} \begin{bmatrix} y_m - \langle y_m \rangle \\ z_m - \langle z_m \rangle \end{bmatrix} \quad (\text{S97})$$

$$= -\ln Z_{yz} - \frac{1}{2} \sum_{m=1}^{\dim} [y_m^\dagger - \langle y_m \rangle^\dagger, z_m^\dagger - \langle z_m \rangle^\dagger] \begin{bmatrix} A_{yy} & -A_{yz} \\ -A_{yz}^\dagger & A_{zzm} \end{bmatrix} \begin{bmatrix} y_m - \langle y_m \rangle \\ z_m - \langle z_m \rangle \end{bmatrix}, \quad (\text{S98})$$

where the covariance matrix is given by

$$\begin{bmatrix} A_{yy} & -A_{yz} \\ -A_{zy} & A_{zzm} \end{bmatrix} \begin{bmatrix} \Sigma_{yyym} & \Sigma_{yzm} \\ \Sigma_{zym} & \Sigma_{zzm} \end{bmatrix} = \begin{bmatrix} I & 0 \\ 0 & I \end{bmatrix}. \quad (\text{S99})$$

Expanding Eq. (S98), we get

$$\ln q(yz) = \text{const.} - \frac{1}{2} \sum_{m=1}^{\dim} \left\{ \begin{bmatrix} y_m^\dagger & z_m^\dagger \end{bmatrix} \begin{bmatrix} A_{yy} & -A_{yz} \\ -A_{zy} & A_{zzm} \end{bmatrix} \begin{bmatrix} y_m \\ z_m \end{bmatrix} - 2 \begin{bmatrix} \langle y_m \rangle^\dagger & \langle z_m \rangle^\dagger \end{bmatrix} \begin{bmatrix} A_{yy} & -A_{yz} \\ -A_{zy} & A_{zzm} \end{bmatrix} \begin{bmatrix} y_m \\ z_m \end{bmatrix} \right\}, \quad (\text{S100})$$

and comparing the linear term with that of Eq. (S92), we see that the expectation values are given by

$$\begin{bmatrix} A_{yy} & -A_{yz} \\ -A_{zy} & A_{zzm} \end{bmatrix} \begin{bmatrix} \langle y_m \rangle \\ \langle z_m \rangle \end{bmatrix} = \begin{bmatrix} 0 \\ V_m x_m \end{bmatrix}. \quad (\text{S101})$$

The A-matrix blocks have some nice sparsity and symmetry properties: diagonal ( $A_{zzm}$ ), symmetric tri-diagonal ( $A_{yy}$ ), or asymmetric and non-square bi-diagonal ( $A_{yz}$ ). We also note that  $A_{zz}$  is guaranteed to be invertible, since it is diagonal and  $\beta\lambda_t > 0$  for all  $t$ . Furthermore, since  $q(y, z)$  is multivariate normal, the marginal distributions for  $y$  and  $z$  are too. This means that both  $\Sigma_{yyym}$  and  $\Sigma_{zzm}$  are invertible, since otherwise the marginals would not be properly defined.

Algorithmically, we can avoid full matrix inversions, since only a special subset of covariances are needed, namely

$$\text{Var}(y_{tm}) = \Sigma_{y_{tm}y_{tm}}, \quad \Sigma_{y_{tm}y_{t+1,m}}, \quad \Sigma_{y_{tm}z_{tm}}, \quad \text{Var}(z_{tm}) = \Sigma_{z_{tm}z_{tm}}, \quad \Sigma_{y_{t+1,m}z_{tm}}. \quad (\text{S102})$$

We also need the determinant of the full covariance matrix for the lower bound, but as we show below, this can be reduced to computing  $|A_{zzm}|$  (easy, since  $A_{zzm}$  is diagonal), and  $|\Sigma_{yyym}^{-1}|$  (also fairly easy, since this matrix is symmetric and tridiagonal).

In all, this suggests that further analytical calculations would be valuable.

*a. Covariance matrices* Manipulations of the inversion equation (S99) leads to

$$\Sigma_{yyym}^{-1} = \underbrace{(A_{yy} - A_{yz}A_{zzm}^{-1}A_{zy})}_{\text{symmetric tridiagonal}}, \quad (\text{S103})$$

$$\Sigma_{yzm} = (A_{yy} - A_{yz}A_{zzm}^{-1}A_{zy})^{-1}A_{yz}A_{zzm}^{-1} = \Sigma_{yyym}A_{yz}A_{zzm}^{-1}, \quad (\text{S104})$$

$$\Sigma_{zym} = \Sigma_{yzm}^\dagger, \quad (\text{S105})$$

$$\Sigma_{zzm} = A_{zzm}^{-1}(I + A_{zy}\Sigma_{yzm}) = A_{zzm}^{-1} + A_{zzm}^{-1}A_{zy}\Sigma_{yyym}A_{yz}A_{zzm}^{-1}. \quad (\text{S106})$$

To figure out which elements are needed, we write out some matrix elements explicitly:

$$\Sigma_{y_{tm},y_{tm}} = (\Sigma_{yyym})_{t,t}, \quad (\text{S107})$$

$$\Sigma_{y_{tm},y_{t+1,m}} = (\Sigma_{yyym})_{t,t+1}, \quad (\text{S108})$$

$$\Sigma_{y_{tm},z_{tm}} = (\Sigma_{yzm})_{t,t} = \dots = \left( (1-\tau) \frac{\Sigma_{y_{tm},y_{tm}}}{\beta\alpha_t} + \tau \frac{\Sigma_{y_{tm},y_{t+1,m}}}{\beta\alpha_t} \right) (A_{zzm}^{-1})_{t,t}, \quad (\text{S109})$$

$$\Sigma_{y_{t+1,m},z_{tm}} = (\Sigma_{yzm})_{t+1,t} = \dots = \left( (1-\tau) \frac{\Sigma_{y_{tm},y_{t+1,m}}}{\beta\alpha_t} + \tau \frac{\Sigma_{y_{t+1,m},y_{t+1,m}}}{\beta\alpha_t} \right) (A_{zzm}^{-1})_{t,t}, \quad (\text{S110})$$

$$\Sigma_{z_{tm},z_{tm}} = (\Sigma_{zzm})_{t,t} = \dots = \left( 1 + (1-\tau) \frac{\Sigma_{y_{tm},z_{tm}}}{\beta\alpha_t} + \tau \frac{\Sigma_{y_{t+1,m},z_{tm}}}{\beta\alpha_t} \right) (A_{zzm}^{-1})_{t,t}. \quad (\text{S111})$$

From this, we see that we only need the diagonal and first off-diagonal of  $\Sigma_{yyym}$ .

It is indeed possible to invert symmetric positive definite tridiagonal matrices from the main diagonal and outwards, for example as described in Ref. [8], which means that this partial inversion can be done in linear time. We use recursion relations from Ref. [8], rewritten so as to minimize the risk of numerical over- or underflow. These relations use a Cholesky factorization as an intermediate step, which is useful for solving triangular systems of equations. They also yield the determinant  $|\Sigma_{yyym}^{-1}|$ .

b. *Mean values* To compute the mean values  $\langle z_m \rangle$ ,  $\langle y_m \rangle$  efficiently, we manipulate Eq. (S101) to get

$$\underbrace{(A_{yy} - A_{yz}A_{zzm}^{-1}A_{yz}^\dagger)}_{= \Sigma_{yym}^{-1}, \text{ symmetric tri-diagonal}} \langle y_m \rangle = A_{yz}A_{zzm}^{-1}V_mx_m, \quad (\text{S112})$$

$$\langle z_m \rangle = A_{zzm}^{-1}(V_mx_m + A_{yz}^\dagger \langle y_m \rangle). \quad (\text{S113})$$

Thus, computing mean values requires inverting a diagonal matrix ( $A_{zzm}$ ) and solving a symmetric tri-diagonal linear system of equations. As mentioned above, one first step in this solution would be a cholesky factorization, which we get as a by-product of partially inverting  $\Sigma_{yym}$ .  $\Sigma_{yym}^{-1}$  is a symmetric tri-diagonal matrix with elements

$$\Sigma_{yym}^{-1} = A_{yy} - A_{yz}A_{zzm}^{-1}A_{yz}^\dagger = \begin{bmatrix} a_1 & c_1 & 0 & \cdots \\ c_1 & a_2 + b_1 & c_2 & \\ 0 & c_2 & a_3 + b_2 & \ddots \\ \vdots & & \ddots & \ddots \\ & & & & a_T + b_{T-1} & c_T \\ & & & & c_T & b_T \end{bmatrix}, \quad (\text{S114})$$

with

$$a_{tm} = \frac{1}{\alpha_t} \left( 1 + \frac{(1-\tau)^2}{\beta} \right) - \frac{(1-\tau)^2}{\beta^2 \alpha_t^2} \left( \frac{o_t}{v_{tm}} + \frac{1}{\beta \alpha_t} \right)^{-1}, \quad (\text{S115})$$

$$b_{tm} = \frac{1}{\alpha_t} \left( 1 + \frac{\tau^2}{\beta} \right) - \frac{\tau^2}{\beta^2 \alpha_t^2} \left( \frac{o_t}{v_{tm}} + \frac{1}{\beta \alpha_t} \right)^{-1}, \quad (\text{S116})$$

$$c_{tm} = \frac{1}{\alpha_t} \frac{R}{\beta} - \frac{\tau(1-\tau)}{\beta^2 \alpha_t^2} \left( \frac{o_t}{v_{tm}} + \frac{1}{\beta \alpha_t} \right)^{-1}. \quad (\text{S117})$$

The RHS of the  $\langle y_m \rangle$  system is given by

$$A_{yz}A_{zzm}^{-1}V_mx_m = \frac{(1-\tau)}{\beta} \begin{bmatrix} \frac{1}{\alpha_1} \left( \frac{o_1}{v_{1m}} + \frac{1}{\beta \alpha_1} \right)^{-1} \frac{x_{1m}}{v_{1m}} \\ \frac{1}{\alpha_2} \left( \frac{o_2}{v_{2m}} + \frac{1}{\beta \alpha_2} \right)^{-1} \frac{x_{2m}}{v_{2m}} \\ \vdots \\ \frac{1}{\alpha_T} \left( \frac{o_T}{v_{Tm}} + \frac{1}{\beta \alpha_T} \right)^{-1} \frac{x_{Tm}}{v_{Tm}} \\ 0 \end{bmatrix} + \frac{\tau}{\beta} \begin{bmatrix} 0 \\ \frac{1}{\alpha_1} \left( \frac{o_1}{v_{1m}} + \frac{1}{\beta \alpha_1} \right)^{-1} \frac{x_{1m}}{v_{1m}} \\ \frac{1}{\alpha_2} \left( \frac{o_2}{v_{2m}} + \frac{1}{\beta \alpha_2} \right)^{-1} \frac{x_{2m}}{v_{2m}} \\ \vdots \\ \frac{1}{\alpha_T} \left( \frac{o_T}{v_{Tm}} + \frac{1}{\beta \alpha_T} \right)^{-1} \frac{x_{Tm}}{v_{Tm}} \end{bmatrix}, \quad (\text{S118})$$

and the  $\langle y \rangle$ -dependent part of  $\langle z \rangle$  is given by

$$A_{zzm}^{-1}A_{yz}^\dagger \langle y_m \rangle = \left[ \dots, \left( \frac{o_t}{v_{tm}} + \frac{1}{\beta \alpha_t} \right)^{-1} \frac{1}{\beta \alpha_t} \left( (1-\tau) \langle y_{tm} \rangle + \tau \langle y_{tm} \rangle \right), \dots \right]^\dagger \in R^{T \times 1}. \quad (\text{S119})$$

### S3.6. The lower bound

We recall the expression for the lower bound just after updating  $q(s)$ ,

$$F = \ln Z_s + \left\langle \ln \frac{p(x|z)}{q(y,z)} \right\rangle_{q(y,z)} + \left\langle \ln \frac{p_0(\theta)}{q(\theta)} \right\rangle_{q(\theta)}. \quad (\text{S23})$$

Here,  $\ln Z_s$  is the normalization constant in Eq. (S81), the contribution from measurement errors is

$$\begin{aligned} \langle \ln p(x|z) \rangle_{q(y,z)} &= -\frac{1}{2} \sum_{t=1}^T \sum_{m=1}^{\dim} o_t \left( \ln(2\pi v_{tm}) + v_{tm}^{-1} \langle (x_{tm} - z_{tm})^2 \rangle \right) \\ &= -\frac{1}{2} \sum_{t=1}^T \sum_{m=1}^{\dim} o_t \left( \ln(2\pi v_{tm}) + \frac{(x_{tm} - \langle z_{tm} \rangle)^2 + \Sigma_{z_{tm}, z_{tm}}}{v_{tm}} \right), \end{aligned} \quad (\text{S120})$$



and the variational terms from  $q(y, z)$  are given, since  $q(y_m, z_m)$  are multivariate normal distributions of dimension  $2T + 1$ , by

$$\begin{aligned} \langle \ln q(y, z) \rangle_{q(y, z)} &= -\frac{2T + 1}{2} (1 + \ln 2\pi) \times \dim + \frac{1}{2} \sum_{m=1}^{\dim} \ln |\Sigma_m^{-1}| \\ &= -\frac{2T + 1}{2} (1 + \ln 2\pi) \times \dim + \frac{1}{2} \sum_{m=1}^{\dim} \ln \begin{vmatrix} A_{yy} & -A_{yz} \\ -A_{zy} & A_{zzm} \end{vmatrix}. \end{aligned} \quad (\text{S121})$$

The determinants can be simplified in various ways. Since  $A_{zzm}$  is diagonal and  $A_{zy} = A_{yz}^\dagger$ , we can use a block LU decomposition and write

$$\begin{bmatrix} A_{yy} & -A_{yz} \\ -A_{zy} & A_{zzm} \end{bmatrix} = \begin{bmatrix} I & -A_{yz} A_{zzm}^{-1} \\ 0 & I \end{bmatrix} \begin{bmatrix} A_{yy} - A_{yz} A_{zzm}^{-1} A_{zy} & 0 \\ 0 & A_{zzm} \end{bmatrix} \begin{bmatrix} I & 0 \\ -A_{zzm}^{-1} A_{zy} & I \end{bmatrix}, \quad (\text{S122})$$

which means that

$$|\Sigma^{-1}| = |A_{zzm}| |A_{yy} - A_{yz} A_{zzm}^{-1} A_{zy}| = |A_{zzm}| |\Sigma_{yy}^{-1}|. \quad (\text{S123})$$

Here,  $A_{zzm}$  is diagonal positive definite, so that determinant is simply the product of the diagonal elements. The second factor is a tridiagonal symmetric matrix which should be positive definite, since it is the inverse of a (symmetric, positive definite) covariance matrix.

Finally, parameter contributions are given by the negative Kullback-Leibler divergence from the variational distribution to the prior,

$$\begin{aligned} \langle \ln p_0(\theta) \rangle_{q(\theta)} - \langle \ln q(\theta) \rangle_{q(\theta)} &= -\left\langle \ln \frac{q(\theta)}{p_0(\theta)} \right\rangle_{q(\theta)} \\ &= -\left\langle \ln \frac{q(\pi)}{p_0(\pi)} \right\rangle_{q(\pi)} - \left\langle \ln \frac{q(a)}{p_0(a)} \right\rangle_{q(a)} - \left\langle \ln \frac{q(B)}{p_0(B)} \right\rangle_{q(B)} - \left\langle \ln \frac{q(\lambda)}{p_0(\lambda)} \right\rangle_{q(\lambda)} \end{aligned} \quad (\text{S124})$$

Here, the contributions from  $\pi, a, B$  are just as in vbSPT. The step length variance is not the same variable as used in vbSPT, but its KL divergence term turns out to be the same:

$$\left\langle \ln \frac{q(\lambda_j)}{p_0(\lambda_j)} \right\rangle_{q(\lambda)} = \dots = \tilde{n}_j \ln \frac{c_j}{\tilde{c}_j} - n_j \left(1 - \frac{\tilde{c}_j}{c_j}\right) - \ln \frac{\Gamma(n_j)}{\Gamma(\tilde{n}_j)} + (n_j - \tilde{n}_j) \psi(n_j) \quad (\text{S125})$$

## S4. MAXIMUM LIKELIHOOD AND MAXIMUM APOSTERIORI INFERENCE

### S4.1. Parameter updates and log likelihood

It might also be useful to perform maximum likelihood inference in the model parameters, to get unbiased estimates and an impression about the influence of the priors. As we saw in Secs. S2.2-S2.3, to derive approximate maximum likelihood (MLE) or maximum a posteriori (MAP) estimates, we simply drop the variational ansatz for the model parameters from the above variational treatment, and replace the optimization w.r.t.  $\ln q(\theta)$  by optimizing the parameter values. Skipping a lot of details, the parameter updates for a single trajectory are given by the classical update

formulae, which we give below for without (MLE) and with (MAP) the conjugate priors used above:

$$\begin{aligned} & (MLE) & (MAP) & (S126) \\ \pi_k^* &= \frac{\langle \delta_{k,s_1} \rangle}{\sum_m \langle \delta_{m,s_1} \rangle}, & \pi_k^* &= \frac{w_k^{(\pi)} - 1}{w_0^{(\pi)} - N}, & (S127) \end{aligned}$$

$$a_k^* = \frac{\sum_{t=1}^{T-1} (1 - \langle \delta_{k,s_t} \delta_{k,s_{t+1}} \rangle)}{\sum_{j=1}^N \langle \delta_{k,s_t} \delta_{j,s_{t+1}} \rangle} = \frac{\sum_{j \neq k} \hat{w}_{kj}}{\sum_j \hat{w}_{kj}}, \quad a_k^* = \frac{w_{k1}^{(a)} - 1}{w_{k0}^{(a)} - 2} = \frac{\tilde{w}_{k1}^{(a)} - 1 + \sum_{j \neq k} \hat{w}_{kj}}{\tilde{w}_{k0}^{(a)} - 2 + \sum_j \hat{w}_{kj}}, \quad (S128)$$

$$B_{kj}^* = \frac{\sum_{t=1}^{T-1} \langle \delta_{k,s_t} \delta_{j,s_{t+1}} \rangle}{\sum_{t=1}^{T-1} (1 - \langle \delta_{k,s_t} \delta_{k,s_{t+1}} \rangle)} = \frac{\hat{w}_{kl}}{\sum_{j \neq k} \hat{w}_{kl}}, \quad B_{kj}^* = \frac{w_{kj}^{(B)} - 1}{\sum_{j \neq k} (w_{kj}^{(B)} - 1)} = \frac{\tilde{w}_{kj}^{(B)} - 1 + \hat{w}_{kj}}{\sum_{j \neq k} (\tilde{w}_{kj}^{(B)} - 1 + \hat{w}_{kj})}, \quad (S129)$$

$$A_{kj}^* = \frac{\sum_{t=1}^{T-1} \langle \delta_{k,s_t} \delta_{j,s_{t+1}} \rangle}{\sum_j \sum_{t=1}^{T-1} \langle \delta_{k,s_t} \delta_{j,s_{t+1}} \rangle}, \quad A_{kj}^* = \begin{cases} (1 - a_k^*), & j = k \\ a_k^* B_{kj}^*, & j \neq k, \end{cases} \quad (S130)$$

$$\lambda_k^* = \frac{\hat{c}_k}{\hat{n}_k}, \quad \lambda_k^* = \frac{c_k}{n_k + 1} = \frac{\tilde{c}_k + \hat{c}_k}{\tilde{n}_k + 1 + \hat{n}_k}, \quad (S131)$$

where  $\hat{c}_k, \hat{n}_k$  are the data dependent terms of Eqs. (S69) and (S70). The MAP notation is the same as used for the variational parameter updates, and includes the same conjugate priors. The iterations for hidden states and path can now be carried out by using delta functions for the variational parameter distributions,  $q(\theta) = \delta(\theta - \theta^*)$ . The lower bound on the likelihood can also be computed with the results above, except that the prior terms are absent (MLE) or just the log prior evaluated at the MAP parameter values. After the  $s$ -update, the lower bound is given by

$$\ln L = \underbrace{\ln Z_s}_{\text{forward-backward}} + \underbrace{\langle \ln p(x|z) \rangle_{y,z}}_{\text{eq. (S120)}} - \underbrace{\langle \ln q(y,z) \rangle_{y,z}}_{\text{eq. (S121)}} + \underbrace{\ln p_0(\theta)}_{\text{MAP only}}. \quad (S132)$$

#### S4.2. Transition matrix parameterization

It is perhaps more common to parameterize  $A$  directly, in which case conjugate priors lead to Dirichlet-distributed matrix rows, with parameters

$$w_{ij}^{(A)} = \tilde{w}_{ij}^{(A)} + \hat{w}_{ij}, \Rightarrow A_{ij}^{MLE} = \frac{\hat{w}_{ij}}{\sum_j \hat{w}_{ij}}, \quad A_{ij}^{MAP} = \frac{w_{ij}^{(A)} - 1}{\sum_j (w_{ij}^{(A)} - 1)} = \frac{\tilde{w}_{ij}^{(A)} - 1 + \hat{w}_{ij}}{\sum_j (\tilde{w}_{ij}^{(A)} - 1 + \hat{w}_{ij})} \quad (S133)$$

Not surprising, the MLE estimate is equivalent to the  $a_i, B_{ij}$  parameterization. However, for the MAP estimates to be consistent, we require

$$A_{kk}^{MAP} = \frac{\tilde{w}_{kk}^{(A)} - 1 + \hat{w}_{kk}}{\sum_j (w_{kj}^{(A)} - 1 + \hat{w}_{kj})} = \frac{\tilde{w}_{k2}^{(a)} - 1 + \hat{w}_{kk}}{\tilde{w}_{k1}^{(a)} + \tilde{w}_{k2}^{(a)} - 2 + \sum_j \hat{w}_{kj}} = 1 - a_k^*, \quad (S134)$$

$$A_{kj}^{MAP} = \frac{\tilde{w}_{kj}^{(A)} - 1 + \hat{w}_{kj}}{\sum_j (w_{kj}^{(A)} - 1 + \hat{w}_{kj})} = \underbrace{\frac{\tilde{w}_{k1}^{(a)} - 1 + \sum_{j \neq k} \hat{w}_{kj}}{\sum_{j \neq k} (\tilde{w}_{kj}^{(B)} - 1) + \sum_{j \neq k} \hat{w}_{kj}}}_{(\dagger)} \times \frac{\tilde{w}_{kj}^{(B)} - 1 + \hat{w}_{kj}}{\tilde{w}_{k1}^{(a)} + \tilde{w}_{k2}^{(a)} - 2 + \sum_j \hat{w}_{kj}} = a_k^* B_{kj}^*, \quad (S135)$$

where the second equation applies only for  $k \neq j$ . The simplest solution seems to be to set  $(\dagger) = 1$ , and then equate nominators and denominators separately, since we seek a solution independent of  $\hat{w}_{kj}$ . This leads to a unique solution

$$\tilde{w}_{k2}^{(a)} = \tilde{w}_{kk}^{(A)}, \quad \tilde{w}_{kj}^{(B)} = \tilde{w}_{kj}^{(A)}, \quad \tilde{w}_{k1}^{(a)} = 1 + \sum_{j \neq k} (\tilde{w}_{kj}^{(B)} - 1). \quad (S136)$$

and thus we see that not all conjugate priors on  $a_k, B_{kj}$  are equivalent to  $A_{ij}$  priors in this sense. Of special interest is the flat prior  $\tilde{w}_{ij}^{(A)} = 1$ , which corresponds to

$$\tilde{w}_{k1}^{(a)} = 1, \quad \tilde{w}_{k2}^{(a)} = 1, \quad \tilde{w}_{kj}^{(B)} = 1, \quad (S137)$$

that leads to  $A^{MAP} = A^{MLE}$  (in both parameterizations).

## S5. LEARNING THE LOCALIZATION UNCERTAINTY

In some cases, point-wise uncertainty estimates might not be available, in which case one can try to infer localization errors from the trajectories instead. It is obviously not a good idea to try to infer point-wise localization uncertainties (an underdetermined problem), but it might work to model an average localization uncertainty, or an average but state-dependent localization uncertainty. Here, we explore those possibilities.

### S5.1. Average localization uncertainty

We start with a single uniform localization error. Compared to the point-wise uncertainty model, this case differs in the model of measured positions, which are instead given by

$$x_{tm} = z_{tm} + \sqrt{v}\xi_{tm}, \quad (\text{S138})$$

corresponding to the likelihood term

$$\ln p(x|z, v) = -\frac{1}{2} \sum_{t=1}^T \sum_{m=1}^{\dim} o_t \left( \ln(2\pi v) + v^{-1}(x_{tm} - z_{tm})^2 \right), \quad (\text{S139})$$

where  $v$  is a single model parameter to be learned. For a maximum likelihood algorithm (MLE), the parameter update is then given by maximizing

$$\langle \ln p(x|z) \rangle_{q(y,z)} = \text{const.} - \hat{n}^{(v)} \ln v - \frac{\hat{c}^{(v)}}{v} \Rightarrow v^* = \frac{\hat{c}^{(v)}}{\hat{n}^{(v)}}, \quad (\text{S140})$$

$$\hat{n}^{(v)} = \frac{\dim}{2} \sum_{t=1}^T o_t, \quad (\text{S141})$$

$$\hat{c}^{(v)} = \frac{1}{2} \sum_{t=1}^T o_t \sum_{m=1}^{\dim} \langle (x_{tm} - z_{tm})^2 \rangle_{q(y,z)} = \frac{1}{2} \sum_{t=1}^T o_t \sum_{m=1}^{\dim} \left( (x_{tm} - \langle z_{tm} \rangle)^2 + \Sigma_{z_t, z_t, m} \right). \quad (\text{S142})$$

The MLE parameter is further used to substitute  $v_{mt}^{-1} \rightarrow 1/v^*$  in  $A_{zzm}$  and  $V_m$  in the  $q(y, z)$  update.

The lower bound is also affected through the modified term  $\langle \ln p(x|z) \rangle_{q(y,z)}$ , and now becomes

$$\langle \ln p(x|z, v) \rangle_{q(y,z)} = -\hat{n}^{(v)} (\ln 2\pi + \ln v) - \frac{\hat{c}^{(v)}}{v}. \quad (\text{S143})$$

In a variational Bayes (VB) algorithm, the conjugate prior is inverse gamma, which leads to

$$\ln q(v) = -\ln Z_v - (n^{(v)} + 1) \ln v - \frac{c^{(v)}}{v}, \quad n^{(v)} = \tilde{n}^{(v)} + \hat{n}^{(v)}, \quad c^{(v)} = \tilde{c}^{(v)} + \hat{c}^{(v)}, \quad (\text{S144})$$

where  $\tilde{\cdot}$  indicates prior parameters, and

$$\langle v \rangle_{q(v)} = \frac{c^{(v)}}{n^{(v)} - 1}, \quad v^*|_{q(v)} = \frac{c^{(v)}}{n^{(v)} + 1}, \quad \langle v^{-1} \rangle_{q(v)} = \frac{n^{(v)}}{c^{(v)}}, \quad \langle \ln v \rangle_{q(v)} = \ln c^{(v)} - \psi(n^{(v)}). \quad (\text{S145})$$

The average  $\langle v^{-1} \rangle_{q(v)}$  is used to substitute  $v_{mt}^{-1}$  in  $A_{zzm}$  and  $V_m$  in the  $q(y, z)$  update, and  $\langle \ln v \rangle_{q(v)}$  is used in the lower bound term

$$\langle \ln p(x|z, v) \rangle_{q(y,z)q(\theta)} = -\hat{n}^{(v)} (\ln 2\pi + \langle \ln v \rangle_{q(\theta)}) - \hat{c}^{(v)} \langle v^{-1} \rangle_{q(\theta)}. \quad (\text{S146})$$

For prior specification, the RMS error, given by  $r = \sqrt{v}$ , is a more intuitive quantity. Its distribution is

$$f(r) = \frac{2c^n}{\Gamma(n)} r^{-(2n+1)} e^{-c/r^2}, \quad (\text{S147})$$

and by making use of the asymptotic series expansion

$$\frac{\Gamma(m + \frac{1}{2})}{\Gamma(m)} = \sqrt{m} \left( 1 - \frac{1}{8m} + \frac{1}{128m^2} + O(m^{-3}) \right) \quad (\text{S148})$$

from Mathworld[9], we get

$$\langle r \rangle = \sqrt{c} \frac{\Gamma(n - \frac{1}{2})}{\Gamma(n)} \approx \sqrt{\frac{c}{n-1}} \left( 1 - \frac{1}{8(n-1)} + \dots \right), \quad (\text{S149})$$

$$r^* = \sqrt{\frac{c}{n + \frac{1}{2}}}, \quad \langle r^2 \rangle = \langle v \rangle = \frac{c}{n-1}. \quad (\text{S150})$$

Further,

$$\text{Var}[r] = \frac{c}{n-1} \left( 1 - (n-1) \left( \frac{\Gamma(n - \frac{1}{2})}{\Gamma(n)} \right)^2 \right) \approx \frac{c}{4(n-1)^2} \left( 1 - \frac{3}{32(n-1)} + \dots \right), \quad (\text{S151})$$

which with leads to

$$\text{std}[r] = \frac{\sqrt{c}}{2(n-1)} \left( 1 - \frac{3}{64(n-1)} + \dots \right). \quad (\text{S152})$$

The first order approximations

$$\langle r \rangle \approx \sqrt{\frac{c}{n-1}} = \sqrt{\langle v \rangle}, \quad \text{std}[r] \approx \frac{\sqrt{c}}{2(n-1)}, \quad \frac{\text{std}[r]}{\langle r \rangle} \approx \frac{1}{2\sqrt{n-1}}, \quad (\text{S153})$$

are better than about 10% for  $n > 2$ , or  $\text{std}[r]/r^* \leq 0.79$ , or  $\text{std}[r]/\langle r \rangle < 0.54$ . It seems likely that one would be able to make an informed guess about the average localization error with smaller uncertainty than that.

If not, since the number of precision parameters does not change with model dimension, it is possible to use a Jeffreys prior  $\sim 1/v$ , corresponding to  $\tilde{n}^{(v)} = c^{(v)} = 0$ . Note that this makes  $\langle v^{-1} \rangle_{q(v)} = \hat{c}^{(v)}/\hat{n}^{(v)}$ , which coincides with the MLE update  $1/v^*$ .

## S5.2. State-wise localization uncertainty

One could also imagine modeling distinct localization uncertainties for different states. For example, this could be caused by motion blur, which contributes a diffusion-dependent terms to the localization uncertainty, or if different states may have different spatial distributions. This case is a little more complicated, since it adds additional interactions to the model. Here, the measurement model is modified to

$$x_{tm} = z_{tm} + \sqrt{v_{s_t}} \xi_{tm}, \quad (\text{S154})$$

corresponding to the likelihood term

$$\ln p(x|z, s, v) = -\frac{1}{2} \sum_{k=1}^N \sum_{t=1}^T \sum_{m=1}^{\dim} o_t \delta_{k,s_t} \left( \ln(2\pi v_k) + v_k^{-1} (x_{tm} - z_{tm})^2 \right), \quad (\text{S155})$$

where there are now  $N$  precision parameters  $v_k$ . This term will also influence the hidden state distribution.

*a. Maximum likelihood* First, the parameter updates are given by maximizing

$$\langle \ln p(x|z, s, v) \rangle_{q(y,z)q(s)} = \text{const.} - \sum_{k=1}^N \left[ \hat{n}_k^{(v)} \ln v_k - \frac{\hat{c}_k^{(v)}}{v_k} \right] \Rightarrow v_k^* = \frac{\hat{c}_k^{(v)}}{\hat{n}_k^{(v)}}, \quad (\text{S156})$$

$$\hat{n}_k^{(v)} = \frac{\dim}{2} \sum_{t=1}^T o_t \langle \delta_{k,s_t} \rangle, \quad (\text{S157})$$

$$\hat{c}_k^{(v)} = \frac{1}{2} \sum_{t=1}^T o_t \langle \delta_{k,s_t} \rangle \sum_{m=1}^{\dim} \langle (x_{tm} - z_{tm})^2 \rangle_{q(y,z)} \quad (\text{S158})$$

$$= \frac{1}{2} \sum_{t=1}^T o_t \langle \delta_{k,s_t} \rangle \sum_{m=1}^{\dim} \left( (x_{tm} - \langle z_{tm} \rangle)^2 + \Sigma_{z_t, z_t, m} \right). \quad (\text{S159})$$

Second, there is an additional term in the hidden state distribution,

$$\ln H_{tk} = \dots - \frac{O_t}{2} \left[ \dim \ln v_k^* + \frac{1}{v_k^*} \sum_{m=1}^{\dim} \left( (x_{tm} - \langle z_{tm} \rangle)^2 + \Sigma_{z_t, z_t, m} \right) \right]. \quad (\text{S160})$$

Third, the localization precision contribution to the trajectory distributions become

$$\ln q(y, z) = -\frac{1}{2} \sum_{k=1}^N \sum_{t=1}^T O_t \frac{\langle \delta_{k, s_t} \rangle}{v_k^*} \sum_{m=1}^{\dim} (x_{tm} - z_{tm})^2 + \dots, \quad (\text{S161})$$

which means that we can introduce an effective time-dependent localization uncertainty given by

$$\tilde{v}_t = \left( \sum_{k=1}^N \frac{\langle \delta_{k, s_t} \rangle}{v_k^*} \right)^{-1}, \quad (\text{S162})$$

which is substituted for  $v_{tm}$  in  $A_{zzm}$  and  $V_m$  for the  $q(y, z)$  update.

Finally, the fact that  $\langle \ln p(x|z, s, v) \rangle_{q(y, z)q(s)}$  contributes to  $\ln q(s)$  means that needs not be explicitly accounted for in the lower bound expression, since it is already included in  $\ln Z_s$ . The lower bound (after an  $s$ -update) then simplifies to

$$\ln L = \ln Z_s - \langle \ln q(y, z) \rangle_{q(y, z)}. \quad (\text{S163})$$

*b. Variational Bayes* For the precision parameters, this is analogous to the 1-parameter case, with inverse gamma priors on  $v_k$  leading to inverse gamma distributions for  $q(v_k)$ ,

$$\ln q(v_k) = -\ln Z_{v_k} - n_k^{(v)} \ln v_k - \frac{c_k^{(v)}}{v_k}, \quad n_k^{(v)} = \tilde{n}_k^{(v)} + \hat{n}_k^{(v)}, \quad c_k^{(v)} = \tilde{c}_k^{(v)} + \hat{c}_k^{(v)}, \quad (\text{S164})$$

and expectation values as in Eq. (S145).

For the hidden states, the additional contribution to  $H$  is

$$\ln H_{tk} = \dots - \frac{O_t}{2} \left[ \dim \langle \ln v_k \rangle + \langle v_k^{-1} \rangle \sum_{m=1}^{\dim} \left( (x_{tm} - \langle z_{tm} \rangle)^2 + \Sigma_{z_t, z_t, m} \right) \right]. \quad (\text{S165})$$

For the trajectory distribution, it is again convenient to introduce an effective time-dependent localization precision

$$\tilde{v}_t = \left( \sum_{k=1}^N \langle \delta_{k, s_t} \rangle \langle v_k^{-1} \rangle \right)^{-1} = \left( \sum_{k=1}^N \langle \delta_{k, s_t} \rangle \frac{n_k^{(v)}}{c_k^{(v)}} \right)^{-1}, \quad (\text{S166})$$

and substitute in  $A_{zzm}$  and  $V_m$ .

Again,  $\ln p(z|x, s, \theta)$  makes no explicit contribution to the lower bound, since it is already included in  $\ln Z_s$ .

- [1] Fredrik Persson, Martin Lindén, Cecilia Unoson, and Johan Elf. Extracting intracellular diffusive states and transition rates from single-molecule tracking data. *Nat. Meth.*, 10(3):265–269, 2013. doi:10.1038/nmeth.2367.
- [2] Andrew J. Berglund. Statistics of camera-based single-particle tracking. *Phys. Rev. E*, 82(1):011917, 2010. doi:10.1103/PhysRevE.82.011917.
- [3] Martin Lindén, Vladimir Čurić, Elias Amselem, and Johan Elf. Pointwise error estimates in localization microscopy. *Nat Commun*, 8:15115, 2017. doi:10.1038/ncomms15115.
- [4] David MacKay. *Information theory, inference, and learning algorithms*. Cambridge University Press, 2003.
- [5] Matthew Beal. *Variational algorithms for approximate Bayesian inference*. PhD thesis, University of Cambridge, UK, 2003. URL <http://www.cse.buffalo.edu/faculty/mbeal/thesis/>.
- [6] Colin H. LaMont and Paul A. Wiggins. The Lindley paradox: The loss of resolution in Bayesian inference. *arXiv:1610.09433 [math, stat]*, 2016. arXiv: 1610.09433.
- [7] A. E. Gelfand and D. K. Dey. Bayesian model choice: Asymptotics and exact calculations. *J. Roy. Stat. Soc. B Met.*, 56(3):501–514, 1994. doi:10.2307/2346123.
- [8] G. Meurant. A review on the inverse of symmetric tridiagonal and block tridiagonal matrices. *SIAM. J. Matrix Anal. & Appl.*, 13(3):707–728, 1992. doi:10.1137/0613045.
- [9] Notel. <http://mathworld.wolfram.com/GammaFunction.html>.
